# Supplementary material for: Carbon dots tailored with a fluorophore for sensitive and selective detection of hydrogen sulfide based on a ratiometric fluorescence signal
Source: Royal Society of Chemistry journal article supplement (doi:10.1039/d0ay00020e), 2020-01-01
Supplement: d0ay00020e1.pdf [file d0ay00020e1.pdf]

## Electronic Supplementary Information

# Carbon Dots Tailored with Fluorophore for Sensitive and Selective Detection of Hydrogen Sulfide based on Ratiometric Fluorescence Signal

Guoqiang Liu,<sup>a</sup> Hongwei Ge,<sup>a</sup> Ranhao Yin,<sup>a</sup> Long Yu,<sup>a</sup> Congming Sun,<sup>a</sup> Weiru Dong,<sup>a</sup> Zhenli Sun,<sup>a</sup> Khalid A. Alamry,<sup>b</sup> Hadi M. Marwani,<sup>b</sup> and Suhua Wang<sup>a, b, \*</sup>

<sup>a</sup>MOE Key Laboratory of Resources and Environmental Systems Optimization, College of Environmental Science and Engineering, North China Electric Power University, Beijing 102206, China.

<sup>b</sup>Chemistry Department, Faculty of Science, King Abdulaziz University, Jeddah 21589, Saudi Arabia.

\* To whom correspondence should be addressed:

E-mail: [wangsuhua@ncepu.edu.cn](mailto:wangsuhua@ncepu.edu.cn) (S. H. Wang)

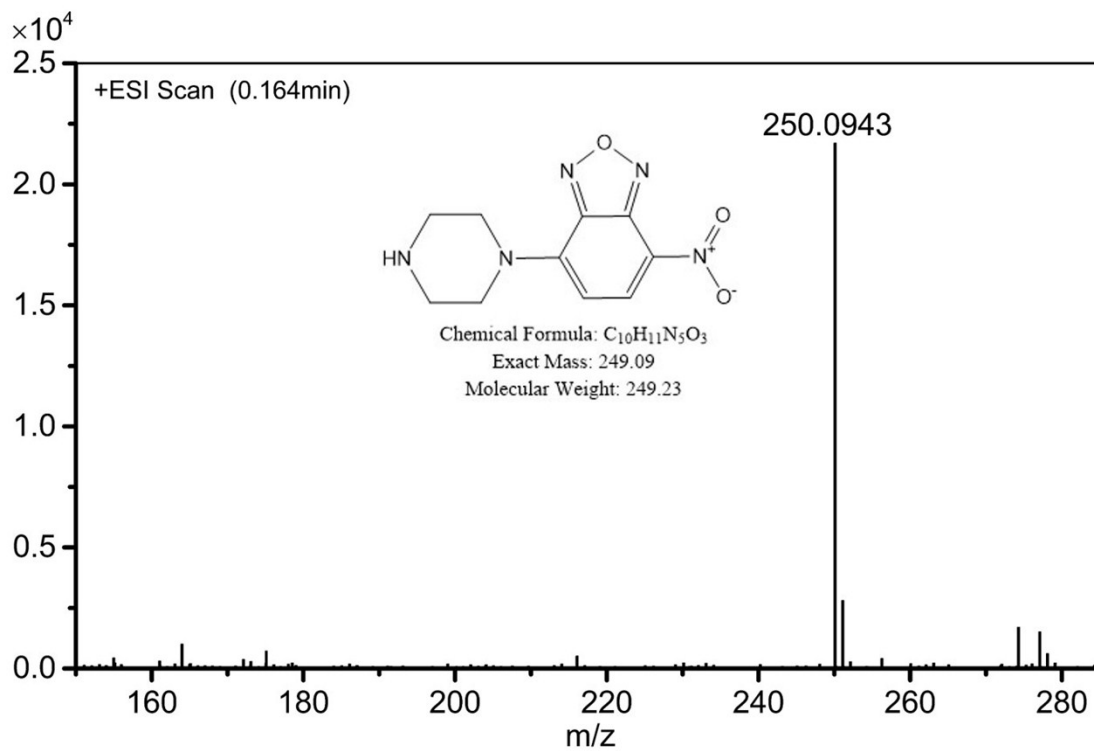

**Fig. S1** HRMS spectrum of P-NBD.

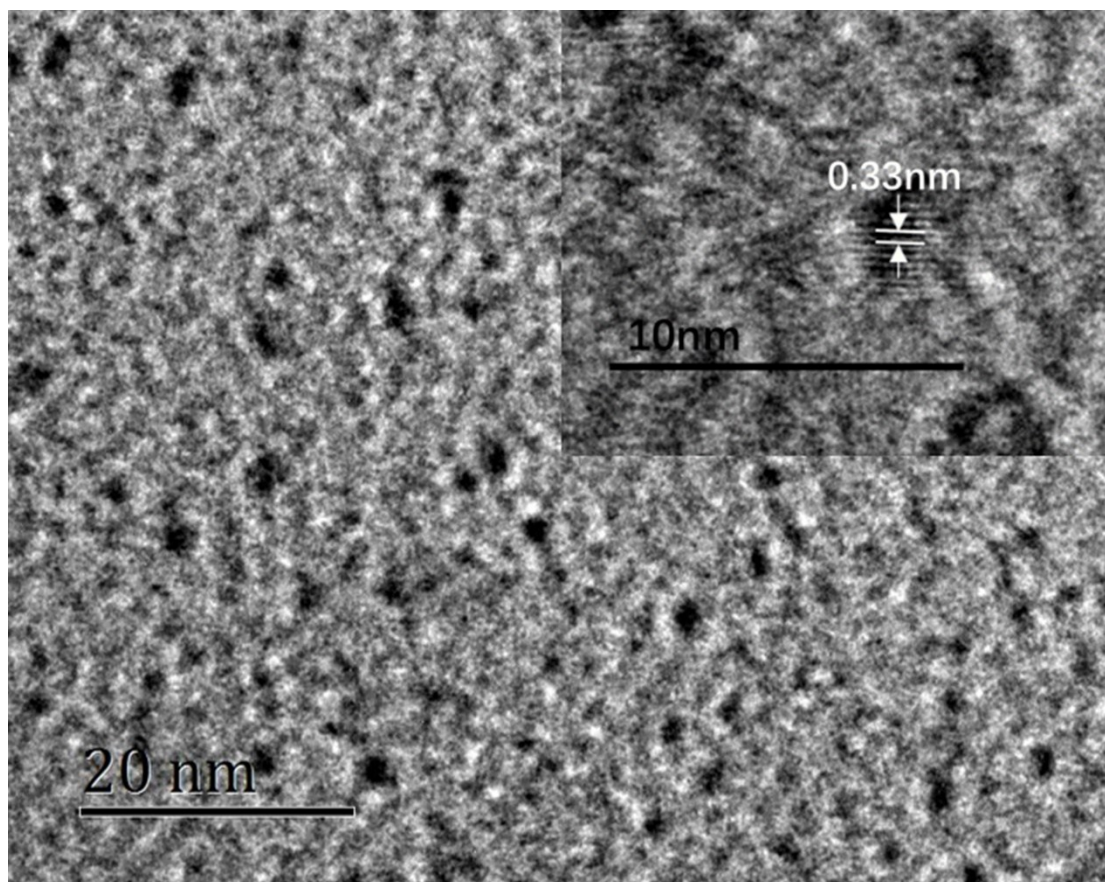

**Fig. S2** TEM image of as-prepared CDs. Inset: the HRTEM image of the CDs.

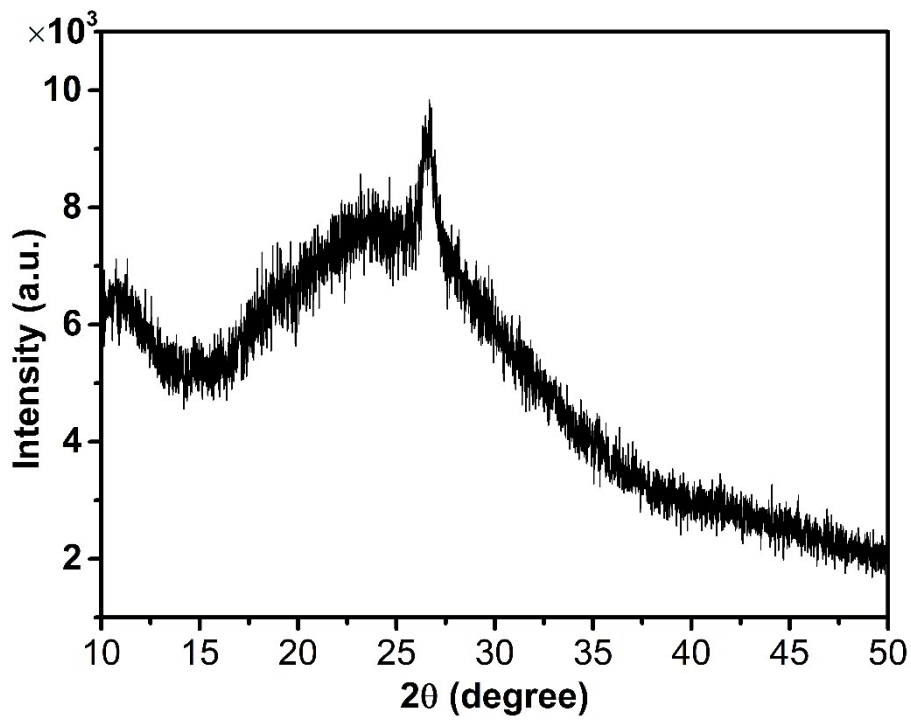

Fig. S3 XRD pattern of the as-synthesized CDs.

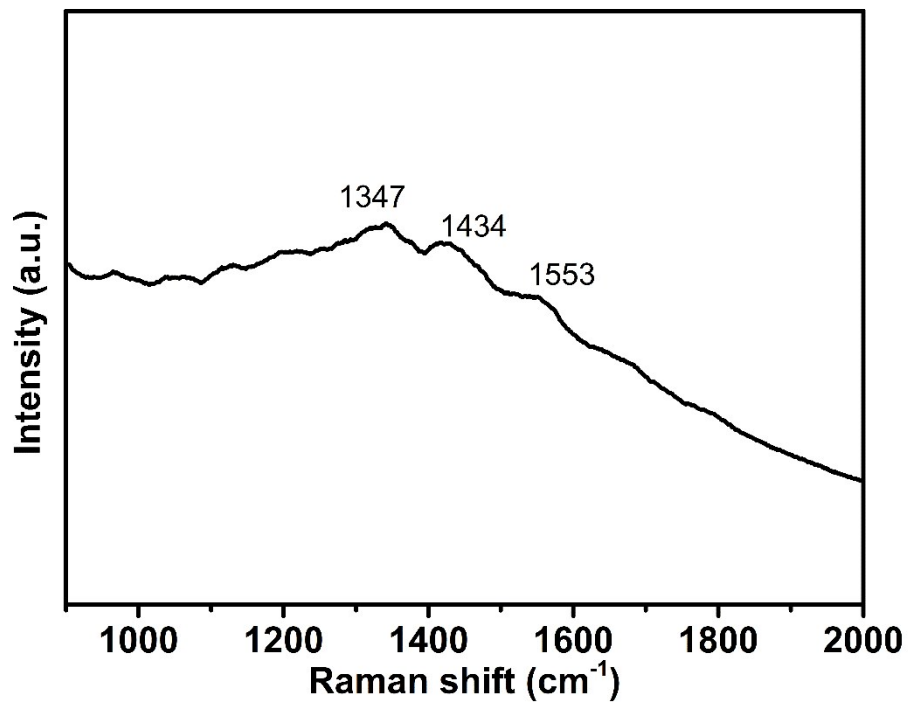

Fig. S4 Raman spectra of the as-synthesized CDs.

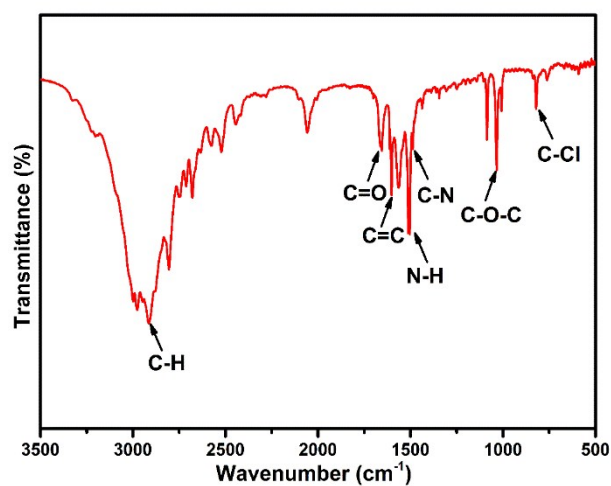

Fig. S5 FTIR spectrum of the as-synthesized CDs.

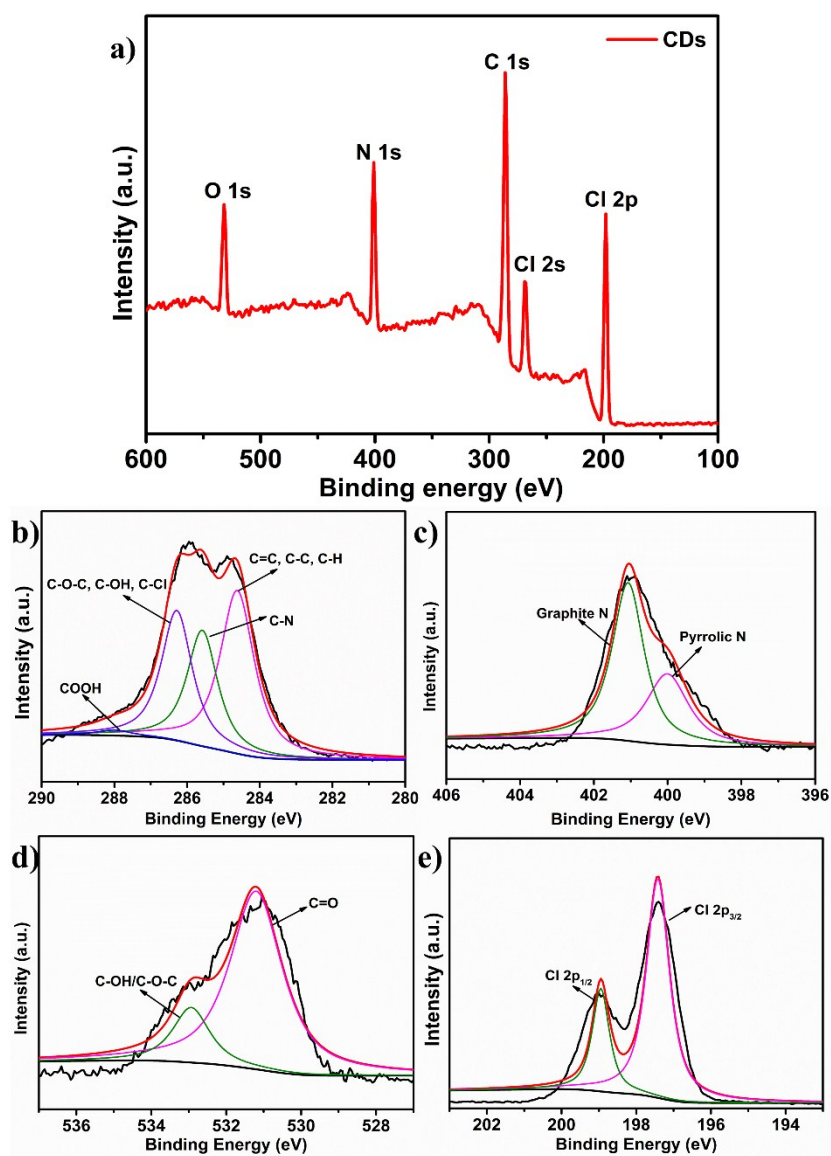

Fig. S6 XPS full survey (a), high-resolution XPS of C 1s (b), N 1s (c), O 1s (d) and Cl

2p spectra of CDs (e).

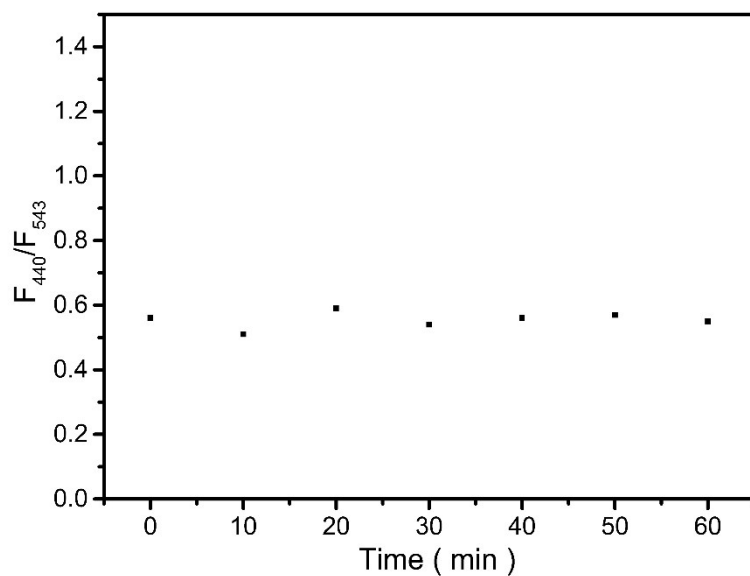

**Fig. S7** Stability of the fluorescence intensity ratio of the ratiometric probe.

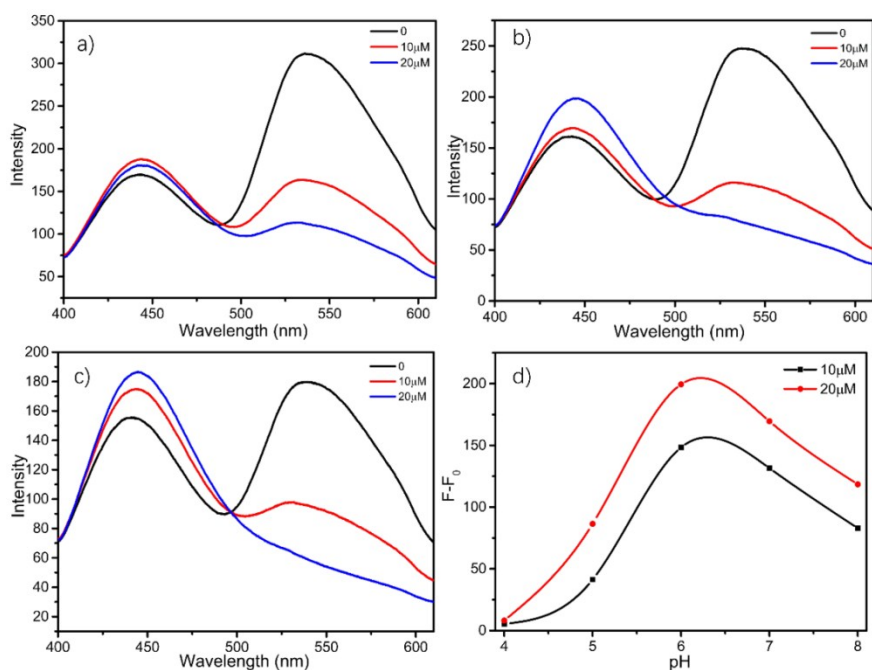

**Fig. S8** Detection of hydrogen sulfide by probe under different pH conditions. a), b), c) is the response of the probe to different concentrations of H<sub>2</sub>S at pH=6, 7, 8. d) Response curve of probe to hydrogen sulfide at pH 4-8. F, F<sub>0</sub> is the fluorescence intensity of probe in the absence and presence of H<sub>2</sub>S, respectively

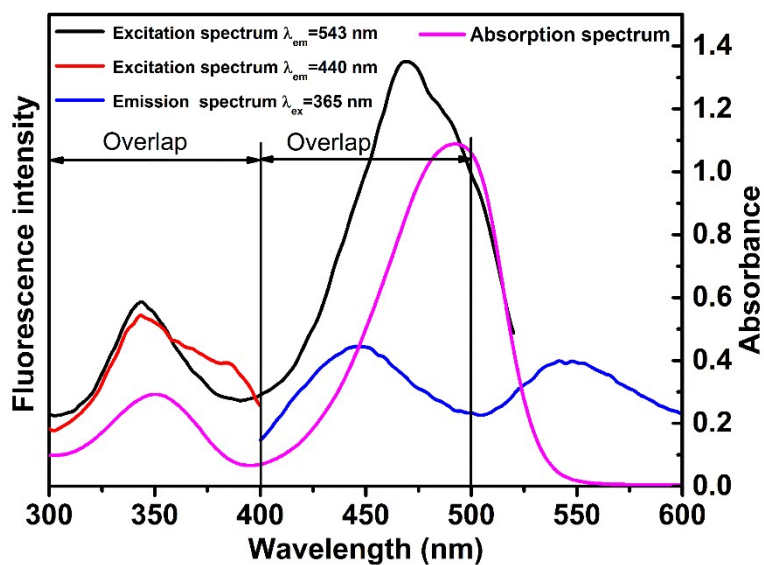

**Fig. S9** The fluorescence emission and excitation spectra of the CDs-PNBD and the absorption spectrum (pink) of the NBD-based derivatives, respectively.

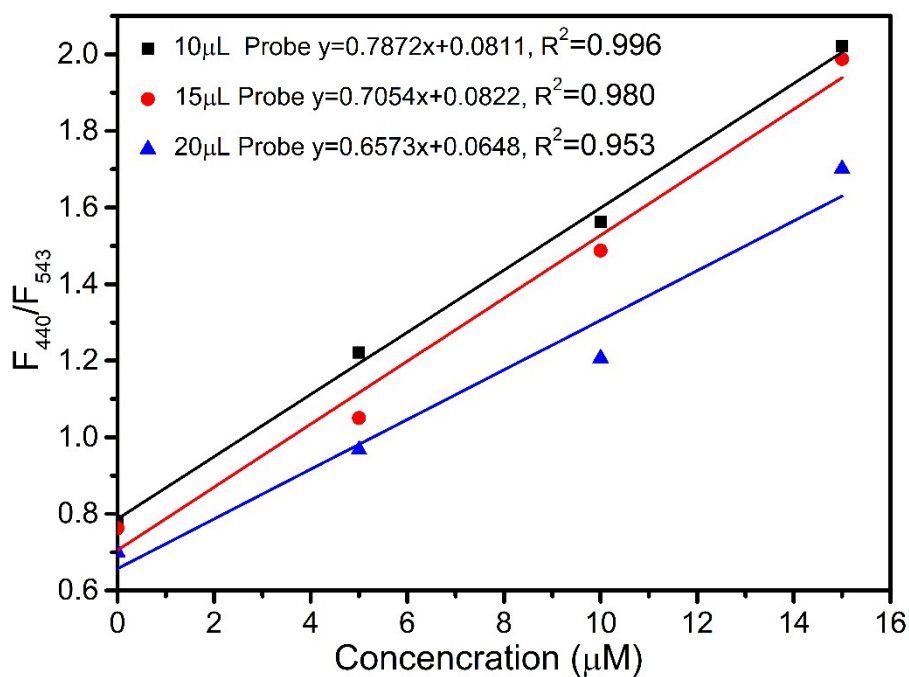

**Fig. S10** The ratio fluorescence curves of reactions with hydrogen sulfide (0, 5, 10, 15  $\mu\text{M}$ , respectively) at three probe concentrations.



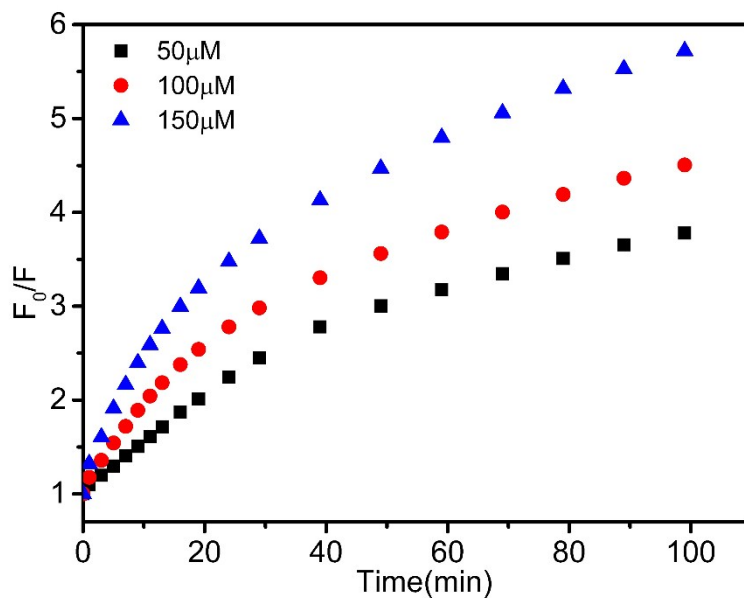

**Fig. S11** Time courses of the responses between fluorescence probe (5  $\mu$ L) with H<sub>2</sub>S at different concentrations (50, 100, 150  $\mu$ M, respectively) in 3 mL PBS solution (pH 6.64),  $\lambda_{\text{ex}}$  =340 nm,  $\lambda_{\text{em}}$  =543 nm.

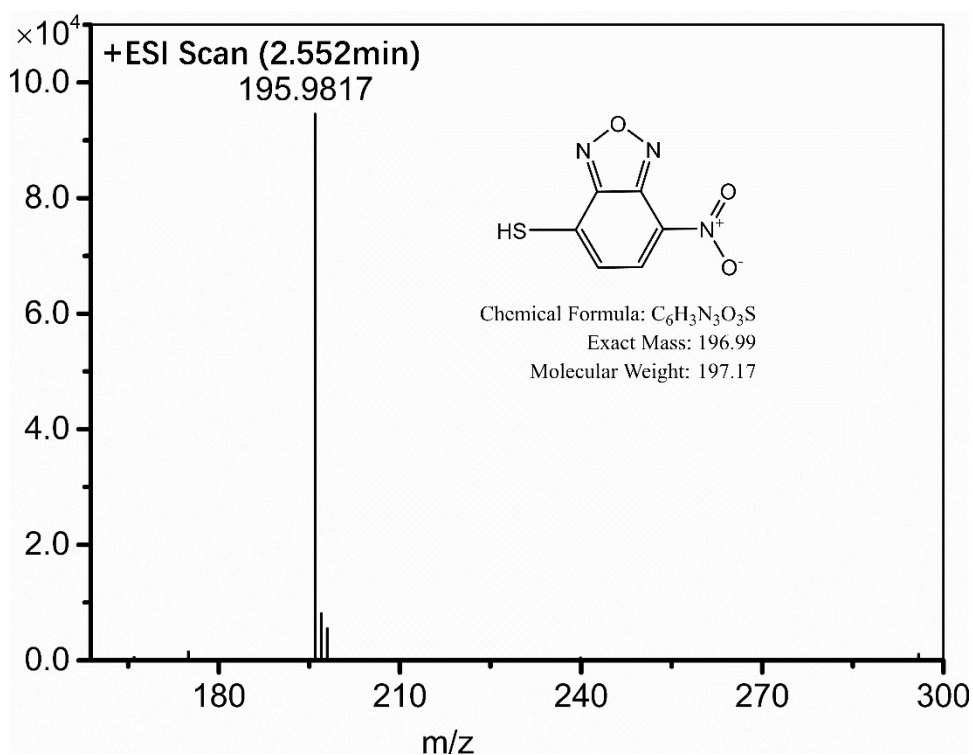

**Fig. S12** LC-MS spectrum of NBD-SH. P-NBD in Methanol (2 ml) and 100  $\mu$ L 100 mM Na<sub>2</sub>S were co-incubated for 2 h at room temperature. Then the reaction mixture was submitted into LC-MS without purification.
